# Supplementary material for: Novel Likely Pathogenic Variants Identified by Panel-Based Exome Sequencing in Congenital Cataract Patients
Source: Hindawi journal article supplement (doi:10.1155/2021/3847409), 2021-11-17

III-3

602\_S00404\_18C025304\_CIVG2-chr2-208986446-208986447\_F121-H9\_F.ab1  
 A C T C T G C A T T C G T G C C C C C C A T C G T G G A

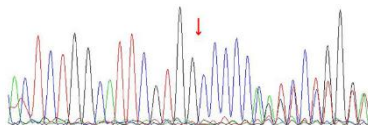

III-2

603\_S00404\_18C025306\_CIVG2-chr2-208986446-208986447\_F121-H9\_F.ab1  
 A T C T G C A T T G T G C C C C C C A G T C C T G G T

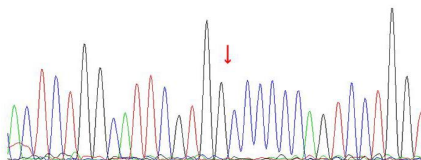

III-1

602\_S00404\_18C025305\_CIVG2-chr2-208986446-208986447\_F121-H9\_F.ab1  
 A C T C T G C A T T C G T G C C C C C C A T C G T G G A

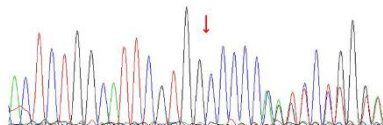

II-3

603\_S00404\_18C025103\_CIVG2-chr2-208986446-208986447\_F121-H9\_F.ab1  
 A C T C T G C A T T C G T G C C C C C C C G T C C T G G T

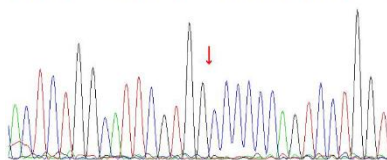

II-1

602\_S00404\_18C025603\_CIVG2-chr2-208986446-208986447\_F121-H9\_F.ab1  
 A C T C T G C A T T C G T G C C C C C C A T C G T G G A

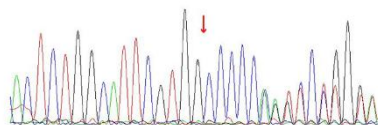

II-4

603\_S00404\_18C025104\_CIVG2-chr2-208986446-208986447\_F121-H9\_F.ab1  
 A C T C T G C A T T C G T G C C C C C C C G T C C T G G T

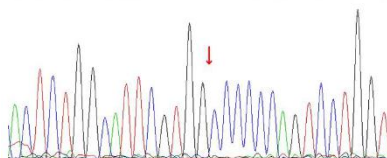

II-2

602\_S00404\_18C025102\_CIVG2-chr2-208986446-208986447\_F121-H9\_F.ab1  
 A C T C T G C A T T C G T G C C C C C C A T C G T G G A

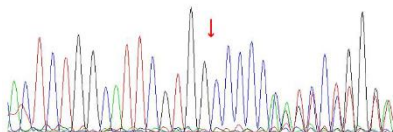

II-5

603\_S00404\_18C025106\_CIVG2-chr2-208986446-208986447\_F121-H9\_F.ab1  
 A C T C T G C A T T C G T G C C C C C C A G T C C T G G T

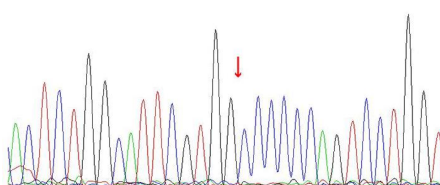

I-2

602\_S00404\_18C025901\_CIVG2-chr2-208986446-208986447\_F121-H9\_F.ab1  
 A C T C T G C A T T C G T G C C C C C C A T C G T G G A

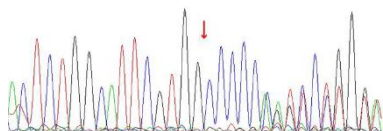

I-1

603\_S00404\_18C025105\_CIVG2-chr2-208986446-208986447\_F121-H9\_F.ab1  
 A C T C T G C A T T C G T G C C C C C C A G T C C T G G T

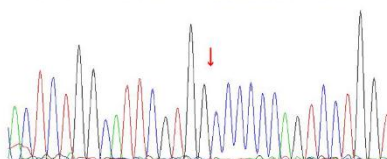

Supplement: f1 [file 3847409.f1.zip]
