# Supplementary material for: Novel Likely Pathogenic Variants Identified by Panel-Based Exome Sequencing in Congenital Cataract Patients
Source: Hindawi journal article supplement (doi:10.1155/2021/3847409), 2021-11-17
Supplement: f1 [file 3847409.f1.zip]

|          | Gene_Symbol | ID                       | Ref_Transcript | Exon   | Nucleotide_Change | Amino_Acid_Change | Gene_Type | 1000g2015aug_all | Pathogenic_Analysis | clinvar | MutRatio | Mutation_Type | dbsnp       | PathSNP | MutInNorm | 1000Genome     | MutInData | 1000g2015aug_all | ESP6500si | Inhouse    | ExAC_ALL  | ExAC_EAS | SIFT   | SIFT_Predict | PolyPhen_2 | PolyPhen_2_Predict | MutationTaster | MutationTaster_Predict | GERP++ | GERP++_Predict | SPIDEX   | REVEL_score | MCAP_score   | MCAP_pred | InterVar  | Highest-MAF | Mygeno_InterACMG | Pathogenic_Analysis |
|----------|-------------|--------------------------|----------------|--------|-------------------|-------------------|-----------|------------------|---------------------|---------|----------|---------------|-------------|---------|-----------|----------------|-----------|------------------|-----------|------------|-----------|----------|--------|--------------|------------|--------------------|----------------|------------------------|--------|----------------|----------|-------------|--------------|-----------|-----------|-------------|------------------|---------------------|
| Family A | MTHFR       | chr1-11855368            | NM_005957      | exon6  | c. 818A>G         | p. K273R          | het       | -                | Uncertain           | -       | 0. 52    | SNV           | -           | #N/A    | #N/A      | #N/A           | #N/A      | -                | -         | -          | -         | -        | 0. 059 | Tolerated    | 0. 038     | Benign             | 1              | Disease_causing        | 3. 53  | Conserved      | -0. 0865 | 0. 368      | 0. 071252519 | P         | Uncertain | -           | PM2              | Uncertain           |
|          | CYP1B1      | chr2-38302213            | NM_000104      | exon2  | c. 319C>G         | p. L107V          | het       | 0. 000399361     | Uncertain           | -       | 0. 55    | SNV           | rs56339482  | #N/A    | #N/A      | chr2-38302213  | #N/A      | 0. 000399361     | -         | 0. 0021739 | 0. 0006   | 0. 0097  | -      | -            | 1          | Probably_damaging  | 0. 997         | Disease_causing        | 2. 73  | Conserved      | 0. 0907  | 0. 647      | 0. 783094831 | P         | Uncertain | 0. 0097     | PS1              | Uncertain           |
|          | GDF6        | chr8-97172666            | NM_001001557   | exon1  | c. 255G>T         | p. P85P           | het       | 0. 00359425      | Uncertain           | -       | 0. 52    | SNV           | rs112296824 | #N/A    | #N/A      | chr8-97172666  | #N/A      | 0. 00359425      | 0. 0041   | 0. 0057    | 0. 0015   | 0. 0051  | -      | -            | -          | -                  | -              | -                      | -      | -              | -        | -           | -            | Benign    | 0. 0057   | BP7         | Uncertain        |                     |
|          | EPG5        | chr18-43496539           | NM_020964      | exon18 | c. 3248C>T        | p. S1083L         | het       | 0. 014976        | Uncertain           | -       | 0. 45    | SNV           | rs78339727  | #N/A    | #N/A      | chr18-43496539 | #N/A      | 0. 014976        | 0. 0208   | 0. 0286    | 0. 029    | 0. 0021  | 0. 019 | Damaging     | 0. 771     | Possibly_damaging  | 0. 999         | Disease_causing        | 5. 78  | Conserved      | -0. 2802 | 0. 184      | -            | -         | Benign    | 0. 029      | BS1              | Uncertain           |
|          | CRYBB2      | chr22-25623876           | NM_000496      | exon4  | c. 230G>T         | p. G77V           | het       | -                | Uncertain           | -       | 0. 39    | SNV           | -           | #N/A    | #N/A      | #N/A           | #N/A      | -                | -         | -          | -         | -        | 0      | Damaging     | 0. 999     | Probably_damaging  | 1              | Disease_causing        | 5. 08  | Conserved      | 0. 5789  | 0. 957      | 0. 157318302 | P         | Uncertain | -           | PM2;PP3          | Likely pathogenic   |
| Family B | POMGNT1     | chr1-46655561            | NM_001243766   | exon20 | c. 1750G>A        | p. D584N          | het       | -                | Uncertain           | -       | 0. 53    | SNV           | -           | #N/A    | #N/A      | #N/A           | #N/A      | -                | -         | -          | -         | -        | 0. 389 | Tolerated    | 0. 079     | Benign             | 1              | Disease_causing        | 5. 92  | Conserved      | -0. 2323 | 0. 077      | 0. 015190102 | B         | Uncertain | -           | PM2;BP1          | Uncertain           |
|          | FOXE3       | chr1-47882145            | NM_012186      | exon1  | c. 158C>T         | p. P53L           | het       | 0. 00658946      | Uncertain           | -       | 0. 6     | SNV           | rs534479543 | #N/A    | #N/A      | #N/A           | #N/A      | 0. 00658946      | -         | 0. 0114    | -         | -        | 0. 159 | Tolerated    | 0. 013     | Benign             | 1              | Polymorphism           | 2. 25  | Conserved      | -        | 0. 113      | -            | -         | Benign    | 0. 0114     | 0                | Uncertain           |
|          | PAX6        | chr11-31811460 31811462  | NM_001258464   | -      | c. *21_*20delAA   | -                 | het       | -                | Uncertain           | -       | 0. 5     | unknown       | rs759391101 | #N/A    | #N/A      | #N/A           | #N/A      | -                | -         | -          | 0. 0009   | 0. 0008  | -      | -            | -          | -                  | -              | -                      | -      | -              | -        | -           | -            | Uncertain | 0. 0009   | PM2         | Uncertain        |                     |
|          | CRYBB2      | chr22-25623876           | NM_000496      | exon4  | c. 230G>A         | p. G77D           | het       | -                | Uncertain           | -       | 0. 45    | SNV           | -           | #N/A    | #N/A      | #N/A           | #N/A      | -                | -         | -          | -         | -        | 0      | Damaging     | 0. 999     | Probably_damaging  | 1              | Disease_causing        | 5. 08  | Conserved      | 1. 3267  | 0. 968      | 0. 219654258 | P         | Uncertain | -           | PM2;PP3          | Likely pathogenic   |
| Family C | BFSP2       | chr3-133119306           | NM_003571      | exon1  | c. 379C>G         | p. Q127E          | het       | 0. 00139776      | Uncertain           | -       | 0. 41    | SNV           | rs185816798 | #N/A    | #N/A      | chr3-133119306 | #N/A      | 0. 00139776      | -         | 0. 0108696 | 0. 0008   | 0. 0115  | 0. 235 | Tolerated    | 0. 021     | Benign             | 0. 989         | Disease_causing        | 3. 81  | Conserved      | -        | 0. 227      | -            | -         | Benign    | 0. 0115     | BS1              | Uncertain           |
|          | BEST1       | chr11-61719298           | NM_004183      | exon2  | c. 20G>A          | p. S7N            | het       | 0. 000199681     | Likely pathogenic   | -       | 0. 57    | SNV           | rs199508634 | #N/A    | #N/A      | chr11-61719298 | #N/A      | 0. 000199681     | -         | -          | 1. 65E-05 | 0. 0002  | 0. 561 | Tolerated    | 0. 006     | Benign             | 1              | Disease_causing        | -1. 72 | Nonconserved   | 0. 1244  | 0. 346      | 0. 013177856 | B         | Uncertain | 0. 0002     | PS1;PM2;PM5;PM5  | Likely pathogenic   |
|          | MIP         | chr12-56848079           | NM_012064      | exon1  | c. 319G>A         | p. V107I          | het       | 0. 0219649       | Uncertain           | -       | 0. 5     | SNV           | rs74641138  | #N/A    | #N/A      | chr12-56848079 | #N/A      | 0. 0219649       | 0. 019    | 0. 0065217 | 0. 0253   | 0. 0395  | 0. 543 | Tolerated    | 0. 012     | Benign             | 1              | Disease_causing        | 4. 29  | Conserved      | -        | 0. 233      | -            | -         | Benign    | 0. 0395     | PM1;BS1          | Uncertain           |
|          | CRYGD       | chr2-208986446 208986447 | NM_006891      | exon3  | c. 475delG        | p. A159Pfs*9      | het       | -                | Likely pathogenic   | -       | 0. 55    | deletion      | -           | #N/A    | #N/A      | #N/A           | #N/A      | -                | -         | -          | -         | -        | -      | -            | -          | -                  | -              | -                      | -      | -              | -        | -           | -            | -         | Uncertain | -           | PVS;PM2          | Likely pathogenic   |
