# Supplementary material for: Novel Likely Pathogenic Variants Identified by Panel-Based Exome Sequencing in Congenital Cataract Patients
Source: Hindawi journal article supplement (doi:10.1155/2021/3847409), 2021-11-17

III-1

R02\_S00404\_18C004495\_CRYBB2-chr22-25623876\_F418-D8\_F.ab1  
T T T G A G A G A G G G C G A G T A C C C C

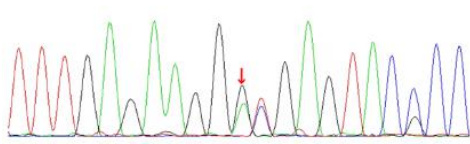

II-1

C02\_S00404\_18C004497\_CRYBB2-chr22-25623876\_F418-D8\_F.ab1  
T T T G A G A A A G G G C G A G T A C C C C

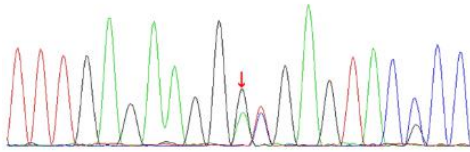

I-2

C02\_S00404\_18C004892\_CRYBB2-chr22-25623876\_F418-D8\_F.ab1  
T T T G A G A A A G G G C G A G T A C C C C

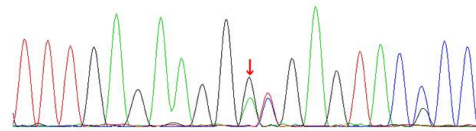

III-2

B02\_S00404\_18C004496\_CRYBB2-chr22-25623876\_F418-D8\_F.ab1  
T T T G A G A A G G G T G A G T A C C C C

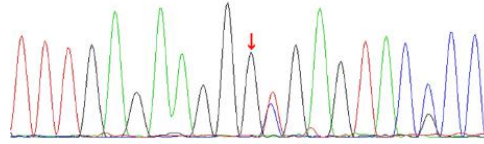

II-2

R07\_S00404\_18C004885\_CRYBB2-chr22-25623876\_F418-D8\_F.ab1  
T T T G A G A A G G G C G A G T A C C C C

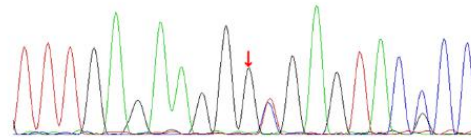

II-3

R07\_S00404\_18C004884\_CRYBB2-chr22-25623876\_F418-D8\_F.ab1  
T T T G A G A A G G G C G A G T A C C C C

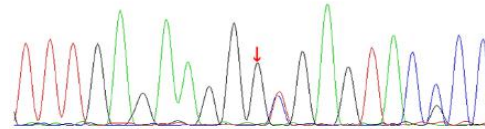

I-1

R07\_S00404\_18C004883\_CRYBB2-chr22-25623876\_F418-D8\_F.ab1  
T T T G A G A A G G G C G A G T A C C C C

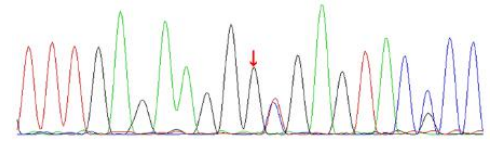

Supplement: f1 [file 3847409.f1.zip]
