# Supplementary material for: Novel Likely Pathogenic Variants Identified by Panel-Based Exome Sequencing in Congenital Cataract Patients
Source: Hindawi journal article supplement (doi:10.1155/2021/3847409), 2021-11-17
Supplement: f1 [file 3847409.f1.zip]

Table S1. Summary of 153 genes contained in this panel.

|          |          |          |          |          |        |
|----------|----------|----------|----------|----------|--------|
| ABCB6    | ABHD12   | ADAMTS10 | ADAMTS17 | ADAMTSL4 | AGK    |
| AGPS     | AIPL1    | ALDH18A1 | ALDH1A3  | ATOH7    | BCOR   |
| BEST1    | BFSP1    | BFSP2    | CAPN5    | CAV1     | CEP290 |
| CHMP4B   | CNBP     | COL11A1  | COL11A2  | COL2A1   | COL7A1 |
| COL9A1   | COL9A2   | CRB1     | CRX      | CRYAA    | CRYAB  |
| CRYBA1   | CRYBA2   | CRYBA4   | CRYBB1   | CRYBB2   | CRYBB3 |
| CRYGA    | CRYGB    | CRYGC    | CRYGD    | CRYGS    | CTDP1  |
| CYP1B1   | CYP27A1  | CYP51A1  | DMPK     | DNA2     | EPG5   |
| EPHA1    | EPHA2    | ERCC2    | ERCC5    | ERCC6    | EZR    |
| FAM126A  | FBN1     | FOXE3    | FTL      | FYCO1    | GALK1  |
| GALT     | GCNT2    | GDF3     | GDF6     | GFER     | GJA3   |
| GJA8     | GNPAT    | GSTM1    | GSTT1    | GUCY2D   | HFE    |
| HMX1     | HSF4     | IARS2    | IDO1     | IFNGR1   | IMPDH1 |
| ITM2B    | JAM3     | LCA5     | LCT      | LIM2     | LMX1B  |
| LRAT     | LTBP2    | MAF      | MFRP     | MIP      | MTHFR  |
| MVK      | MYH9     | NAT2     | NECTIN3  | NEUROD1  | NF2    |
| NHS      | NMNAT1   | NOD2     | OAT      | OCRL     | OPA3   |
| P3H2     | PAX6     | PEX11B   | PEX16    | PEX5     | PEX7   |
| PITX2    | PITX3    | POLG     | POLG2    | PRSS56   | PXDN   |
| RAB18    | RAB3GAP1 | RAB3GAP2 | RAX      | RBP4     | RD3    |
| RDH11    | RDH12    | RECQL4   | RNASEH1  | RNLS     | RPE65  |
| RPGRIP1  | RRM2B    | SC5D     | SEC23A   | SHH      | SIL1   |
| SLC16A12 | SLC25A4  | SLC2A1   | SLC33A1  | SORD     | SPATA7 |
| SRD5A3   | SREBF2   | STRA6    | TBC1D20  | TDRD7    | TEAD1  |
| TENM3    | TMEM114  | TMEM70   | TULP1    | UNC45B   | VIM    |
| VSX2     | WFS1     | WRN      |          |          |        |
