# Supplementary figures and images for: Novel Likely Pathogenic Variants Identified by Panel-Based Exome Sequencing in Congenital Cataract Patients
Source: Hindawi journal article supplement (doi:10.1155/2021/3847409), 2021-11-17

III-1

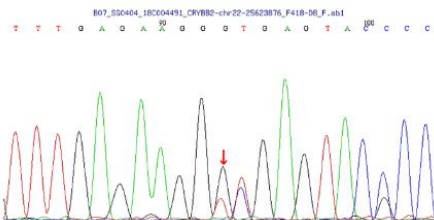

III-2

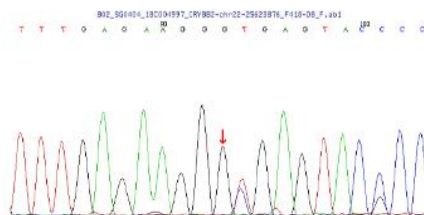

II-2

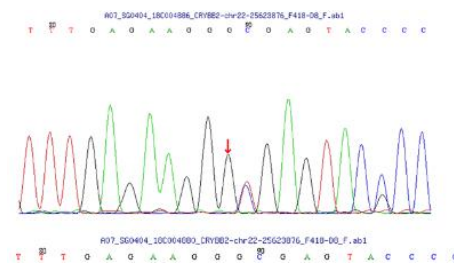

II-1

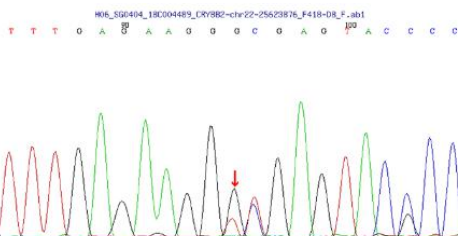

III-3

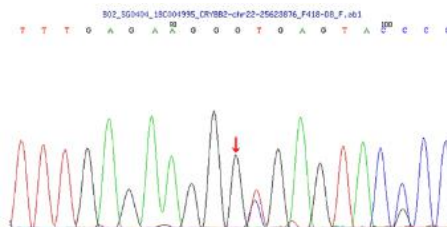

II-4

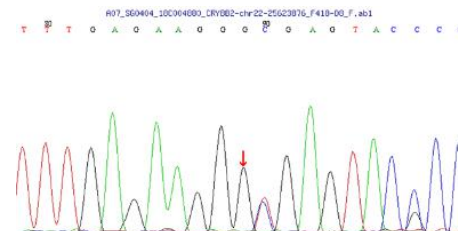

I-1

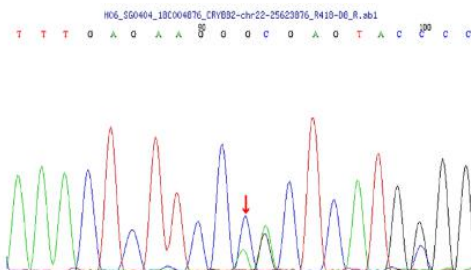

III-4

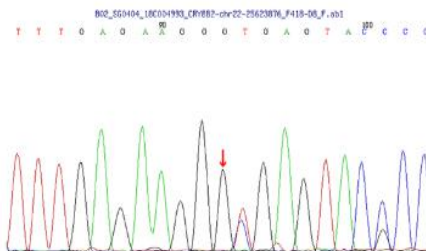

I-2

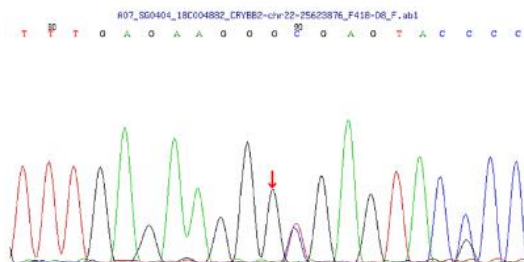

II-3

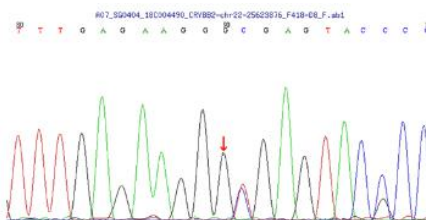

Supplement: f1 [file 3847409.f1.zip]
